# Supplementary material for: Contents of the Sexual and Reproductive Health Subject in the Undergraduate Nursing Curricula of Spanish Universities, a Cross Sectional Study
Source: Preprints.org preprint supplement (doi:10.20944/preprints202109.0045.v1), 2021-09-02
Supplement: Supplementary file 1 [file supplementary]

**Appendix A.** Subtopics of the area of Reproductive Health. (N = 77)

|  | **Total**  **Universities**  **(N = 77)** | | **Public**  **Universities**  **(n = 52)** | | **Private**  **Universities**  **(n = 25)** | |  |
| --- | --- | --- | --- | --- | --- | --- | --- |
|  | **n** | **%** | **n** | **%** | **n** | **%** | **p** |
| **I. Human reproduction** |  |  |  |  |  |  |  |
| 1. Anatomy of the female reproductive organs | **60** | **77,9** | 40 | 76,9 | 20 | 80,0 |  |
| 2. Physiology of the female reproductive system | **61** | **79,2** | 42 | 80,8 | 19 | 76,0 |  |
| 3. Anatomy and physiology of the male reproductive system 14.2 | 32 | 41,6 | 24 | 46,2 | 8 | 32,0 | < 0,05 |
| 4. Gametogenesis 10.5 | 33 | 42,9 | 24 | 46,2 | 9 | 36,0 | < 0,05 |
|  |  |  |  |  |  |  |  |
| **II. Human prenatal development** |  |  |  |  |  |  |  |
| 1. Fertilization, implantation, germ disc | 50 | 64,9 | 35 | 67,3 | 15 | 60,0 |  |
| 2. Embryonic period | 43 | 55,8 | 29 | 55,8 | 14 | 56,0 |  |
| 3. Fetal period | 42 | 54,5 | 30 | 57,7 | 12 | 48,0 |  |
| 4. Development and structure of the placenta 12.5 | 25 | 32,5 | 19 | 36,5 | 6 | 24,0 | < 0,05 |
|  |  |  |  |  |  |  |  |
| **III. Pregnancy** |  |  |  |  |  |  |  |
| 1. Preconception consultation | 34 | 44,2 | 26 | 50,0 | 8 | 32,0 | < 0,05 |
| 2. Pregnancy | **65** | **84,4** | 45 | 86,5 | 20 | 80,0 |  |
| 3. Diagnosis of pregnancy | 41 | 53,2 | 30 | 57,7 | 11 | 44,0 | < 0,05 |
| 4. Prenatal care | 46 | 59,7 | 31 | 59,6 | 15 | 60,0 |  |
| 5. Prenatal diagnosis | 27 | 35,1 | 22 | 42,3 | 5 | 20,0 | < 0,01 |
| 6. Assessment of fetal well-being | 31 | 40,3 | 25 | 48,1 | 6 | 24,0 | < 0,01 |
| 7. Health education for pregnant women | 33 | 42,9 | 28 | 53,8 | 5 | 20,0 | < 0,001 |
| 8. Nutrition of the pregnant woman | 24 | 31,2 | 21 | 40,4 | 3 | 12,0 | < 0,01 |
| 9. Factors that affect the development of pregnancy | 24 | 31,2 | 20 | 38,5 | 4 | 16,0 | < 0,01 |
| 10. Drugs in pregnancy | 17 | 22,1 | 15 | 28,8 | 2 | 8,0 | < 0,01 |
| 11. Psychosocial aspects in pregnancy | 26 | 33,8 | 23 | 44,2 | 3 | 12,0 | < 0,001 |
| 12. Maternity education programs | 25 | 32,5 | 22 | 42,3 | 3 | 12,0 | < 0,001 |
| 13. Assisted reproduction | 20 | 26,0 | 18 | 34.6 | 2 | 8.0 | < 0,01 |
|  |  |  |  |  |  |  |  |
| **IV. Health problems during pregnancy** |  |  |  |  |  |  |  |
| 1. Bleeding problems | **63** | **81,8** | 44 | 84,6 | 19 | 76,0 |  |
| 2. Hypertensive states | **64** | **83,1** | 45 | 86,5 | 19 | 76,0 | < 0,05 |
| 3. Diabetes | 56 | 72,7 | 40 | 76,9 | 16 | 64,0 | < 0,05 |
| 4. Anemias | 44 | 57,1 | 30 | 57,7 | 14 | 56,0 |  |
| 5. Heart problems. Heart disease | 43 | 55,8 | 30 | 57,7 | 13 | 52,0 |  |
| 6. Varicose syndromes | 39 | 50,6 | 27 | 51,9 | 12 | 48,0 |  |
| 7. Endocrine problems | 46 | 59,7 | 31 | 59,6 | 15 | 60,0 |  |
| 8. Renal problems | 43 | 55,8 | 29 | 55,8 | 14 | 56,0 |  |
| 9. Hyperemesis | 51 | 66,2 | 34 | 65,4 | 17 | 68,0 |  |
| 10. Oral and digestive problems | 44 | 57,1 | 29 | 55,8 | 15 | 60,0 |  |
| 11. Respiratory problems | 43 | 55,8 | 29 | 55,8 | 14 | 56,0 |  |
| 12. Neurological problems | 42 | 54,5 | 29 | 55,8 | 13 | 52,0 |  |
| 13. Dermatological problems | 40 | 51,9 | 27 | 51,9 | 13 | 52,0 |  |
| 14. Neoplastic problems | 44 | 57,1 | 31 | 59,6 | 13 | 52,0 |  |
| 15. Infectious problems | **60** | **77,9** | 40 | 76,9 | 20 | 80,0 |  |
| 16. AIDS | 48 | 62,3 | 33 | 63,5 | 15 | 60,0 |  |
| 17. Consumption of toxic substances | 43 | 55,8 | 29 | 55,8 | 14 | 56,0 |  |
| 18. Perinatal hemolytic disease | 42 | 54,5 | 29 | 55,8 | 13 | 52,0 |  |
| 19. Alterations of the placenta, membranes, cord and amniotic fluid | 49 | 63,6 | 31 | 59,6 | 18 | 72,0 | < 0,05 |
| 20. Multiple gestation | 51 | 66,2 | 37 | 71,2 | 14 | 56,0 | < 0,05 |
| 21. Threat of premature labor | 50 | 64,9 | 35 | 67,3 | 15 | 60,0 |  |
| 22. Prolonged pregnancy | 44 | 57,1 | 30 | 57,7 | 14 | 56,0 |  |
| 23. Intrauterine growth retardation | 46 | 59,7 | 32 | 61,5 | 14 | 56,0 |  |
| 24. Psychological aspects of pregnancy at risk | 42 | 54,5 | 28 | 53,8 | 14 | 56,0 |  |
| 25. Mental health disorders | 40 | 51,9 | 27 | 51,9 | 13 | 52,0 |  |
| 26. Antepartum fetal death | 41 | 53,2 | 29 | 55,8 | 12 | 48,0 |  |
| 27. Drugs in health problems | 39 | 50,6 | 27 | 51,9 | 12 | 48,0 |  |
| 28. Genetic counseling and prenatal diagnosis. Reproductive advice | 42 | 54,5 | 29 | 55,8 | 13 | 52,0 |  |
|  |  |  |  |  |  |  |  |
| **V. Delivery** |  |  |  |  |  |  |  |
| 1. Labor and delivery | **61** | **79,2** | 39 | 75,0 | 22 | 88,0 | < 0,05 |
| 2. Factors involved in childbirth | 36 | 46,8 | 22 | 42,3 | 14 | 56,0 | < 0,05 |
| 3. Start of labor and delivery periods | 50 | 64,9 | 32 | 61,5 | 18 | 72,0 | < 0,05 |
| 4. Mechanism of delivery in vertex presentation | 29 | 37,7 | 20 | 38,5 | 9 | 36,0 |  |
| 5. Assistance and care of the woman in childbirth | 48 | 62,3 | 31 | 59,6 | 17 | 68,0 |  |
| 6. Assessment of fetal well-being | 31 | 40,3 | 22 | 42,3 | 9 | 36,0 |  |
| 7. Pain relief in labor | 37 | 48,1 | 23 | 44,2 | 14 | 56,0 | < 0,05 |
| 8. Attention to normal delivery | 51 | 66,2 | 35 | 67,3 | 16 | 64,0 |  |
| 9. Drugs in childbirth | 22 | 28,6 | 15 | 28,8 | 7 | 28,0 |  |
| 10. Obstetric analgesia and anesthesia | 24 | 31,2 | 16 | 30,8 | 8 | 32,0 |  |
| 11. Assistance and care of the woman in directed childbirth | 30 | 39,0 | 21 | 40,4 | 9 | 36,0 |  |
| 12. Psychological aspects of women during labor | 25 | 32,5 | 17 | 32,7 | 8 | 32,0 |  |
| 13. Different alternatives in obstetric care | 24 | 31,2 | 16 | 30,8 | 8 | 32,0 |  |
|  |  |  |  |  |  |  |  |
| **VI. Complications in labor and delivery** |  |  |  |  |  |  |  |
| 1. Dystocic delivery | 54 | 70,1 | 33 | 63,5 | 21 | 84,0 | < 0,01 |
| 2. Alterations in fetal statics | 35 | 45,5 | 24 | 46,2 | 11 | 44,0 |  |
| 3. Obstetric instrumentation and interventions | 39 | 50,6 | 27 | 51,9 | 12 | 48,0 |  |
| 4. Birth trauma | 34 | 44,2 | 24 | 46,2 | 10 | 40,0 |  |
| 5. Premature rupture of membranes | 42 | 54,5 | 29 | 55,8 | 13 | 52,0 |  |
| 6. Intrapartum fever | 31 | 40,3 | 22 | 42,3 | 9 | 36,0 |  |
| 7. Risk of loss of fetal well-being | 33 | 42,9 | 24 | 46,2 | 9 | 36,0 | < 0,05 |
| 8. Preterm delivery | 35 | 45,5 | 25 | 48,1 | 10 | 40,0 |  |
| 9. Birth abnormalities | 35 | 45,5 | 24 | 46,2 | 11 | 44,0 |  |
| 10. Childbirth and puerperium hemorrhages | 34 | 44,2 | 22 | 42,3 | 12 | 48,0 |  |
| 11. Drugs in Complicated Labor | 31 | 40,3 | 21 | 40,4 | 10 | 40,0 |  |
| 12. Special obstetric emergency situations | 39 | 50,6 | 28 | 53,8 | 11 | 44,0 |  |
|  |  |  |  |  |  |  |  |
| **VII. Puerperium and lactation** |  |  |  |  |  |  |  |
| 1. The puerperium | **65** | **84,4** | 45 | 86,5 | 20 | 80,0 |  |
| 2. Drugs in the puerperium and lactation | 14 | 18,2 | 12 | 23,1 | 2 | 8,0 | < 0,05 |
| 3. Psychosocial adaptation of the puerperal woman | 21 | 27,3 | 19 | 36,5 | 2 | 8,0 | < 0,01 |
| 4. Lactation | 22 | 28,6 | 18 | 34,6 | 4 | 16,0 | < 0,05 |
| 5. Breastfeeding | 55 | 71,4 | 36 | 69,2 | 19 | 76,0 |  |
| 6. Home care in the puerperium | 21 | 27,3 | 18 | 34,6 | 3 | 12,0 | < 0,01 |
| 7. Postpartum programs | 16 | 20,8 | 14 | 26,9 | 2 | 8,0 | < 0,05 |
|  |  |  |  |  |  |  |  |
| **VIII. Health problems in the puerperium** |  |  |  |  |  |  |  |
| 1. Puerperal fever | 41 | 53,2 | 29 | 55,8 | 12 | 48,0 |  |
| 2. Thromboembolic disease | 49 | 63,6 | 35 | 67,3 | 14 | 56,0 | < 0,05 |
| 3. Pelvic joint injuries. Scar dehiscences | 41 | 53,2 | 29 | 55,8 | 12 | 48,0 |  |
| 4. Psychological disorders in the puerperium | 44 | 57,1 | 32 | 61,5 | 12 | 48,0 | < 0,05 |
| 5. The grieving process in motherhood and reproduction | 42 | 54,5 | 30 | 57,7 | 12 | 48,0 |  |
| 6. Drugs in the puerperium with complications | 41 | 53,2 | 30 | 57,7 | 11 | 44,0 | < 0,05 |
|  |  |  |  |  |  |  |  |
| **IX. Women's reproductive health care** |  |  |  |  |  |  |  |
| 1. Women's Sexual and Reproductive Health Care Programs | 20 | 26,0 | 15 | 28,8 | 5 | 20,0 |  |
| 2. Attention to women's sexual and reproductive health | 37 | 48,1 | 24 | 46,2 | 13 | 52,0 |  |
| 3. Family planning and contraceptive counseling | 38 | 49,4 | 32 | 61,5 | 6 | 24,0 | < 0,001 |
| 4. Natural methods | 28 | 36,4 | 22 | 42,3 | 6 | 24,0 | < 0,05 |
| 5. Barrier methods | 28 | 36,4 | 22 | 42,3 | 6 | 24,0 | < 0,05 |
| 6. Hormonal contraception | 21 | 27,3 | 19 | 36,5 | 2 | 8,0 | < 0,01 |
| 7. Intrauterine device | 19 | 24,7 | 16 | 30,8 | 3 | 12,0 | < 0,05 |
| 8. Surgical methods | 16 | 20,8 | 12 | 23,1 | 4 | 16,0 |  |
| 9. Contraception in special situations | 12 | 15,6 | 11 | 21,2 | 1 | 4,0 | < 0,05 |
| 10. Voluntary termination of pregnancy | 12 | 15,6 | 11 | 21,2 | 1 | 4,0 | < 0,05 |
| 11. Puberty and adolescence | 29 | 37,7 | 18 | 34,6 | 11 | 44,0 |  |
| 12. Climacteric and menopause | **58** | **75,3** | 38 | 73,1 | 20 | 80,0 |  |
| 13. Drugs in sexual and reproductive health care | 8 | 10,4 | 8 | 15,4 | 0 | 0,0 | < 0,05 |
|  |  |  |  |  |  |  |  |
| **X. Care for women with reproductive health problems** |  |  |  |  |  |  |  |
| 1. Alterations of the menstrual cycle | 45 | 58,4 | 31 | 59,6 | 14 | 56,0 |  |
| 2. Sexually transmitted infections | 51 | 66,2 | 34 | 65,4 | 17 | 68,0 |  |
| 3. Infectious processes of the reproductive system | 37 | 48,1 | 24 | 46,2 | 13 | 52,0 |  |
| 4. Pelvic pain | 17 | 22,1 | 12 | 23,1 | 5 | 20,0 |  |
| 5. Infertility and sterility | 38 | 49,4 | 25 | 48,1 | 13 | 52,0 |  |
| 6. Malformations of the genital tract | 18 | 23,4 | 12 | 23,1 | 6 | 24,0 |  |
| 7. Benign alterations of the female genital tract | 32 | 41,6 | 23 | 44,2 | 9 | 36,0 |  |
| 8. Changes in genital statics | 15 | 19,5 | 9 | 17,3 | 6 | 24,0 |  |
| 9. Urinary incontinence | 15 | 19,5 | 12 | 23,1 | 3 | 12,0 | < 0,05 |
| 10. Benign breast disorders | 33 | 42,9 | 19 | 36,5 | 14 | 56,0 | < 0,05 |
| 11. Early diagnosis of breast and gynecological cancer | 36 | 46,8 | 24 | 46,2 | 12 | 48,0 |  |
| 12. Gynecological and breast cancer | 47 | 61,0 | 30 | 57,7 | 17 | 68,0 | < 0,05 |
| 13. Drugs in sexual and reproductive health problems | 8 | 10,4 | 7 | 13,5 | 1 | 4,0 |  |
| 14. Gynecological Surgical Interventions | 12 | 15,6 | 8 | 15,4 | 4 | 16,0 |  |
| 15. The hospitalized gynecological patient | 12 | 15,6 | 8 | 15,4 | 4 | 16,0 |  |
|  |  |  |  |  |  |  |  |
| **XI. Epidemiology and demography in reproductive health** |  |  |  |  |  |  |  |
| 1. Epidemiology | 7 | 9,1 | 5 | 9,6 | 2 | 8,0 |  |
| 2. Diagnostic tests in reproductive health processes | 9 | 11,7 | 6 | 11,5 | 3 | 12,0 |  |
| 3. Maternal and reproductive health demographics | 3 | 3,9 | 2 | 3,8 | 1 | 4,0 |  |
| 4. Reproductive morbidity | 2 | 2,6 | 1 | 1,9 | 1 | 4,0 |  |
|  |  |  |  |  |  |  |  |
| **XII. Socio-anthropological aspects in reproductive health** |  |  |  |  |  |  |  |
| 1. Sociocultural influences on reproductive health care | 4 | 5,2 | 2 | 3,8 | 2 | 8,0 |  |
| 2. Gender perspective | 10 | 13,0 | 8 | 15,4 | 2 | 8,0 |  |
| 3. The family and family forms | 6 | 7,8 | 4 | 7,7 | 2 | 8,0 |  |
| 4. Anthropology of motherhood | 3 | 3,9 | 2 | 3,8 | 1 | 4,0 |  |
| 5. Women and immigration | 1 | 1,3 | 0 | 0,0 | 1 | 4,0 |  |
|  |  |  |  |  |  |  |  |
| **XIII. Women's Health Education and Research** |  |  |  |  |  |  |  |
| 1. Education for women's health | 30 | 39,0 | 22 | 42,3 | 8 | 32,0 | < 0,05 |
| 2. Individual health education and group health education | 6 | 7,8 | 3 | 5,8 | 3 | 12,0 |  |
| 3. Learning in adults | 5 | 6,5 | 3 | 5,8 | 2 | 8,0 |  |
| 4. Health attitudes and behaviors | 10 | 13,0 | 7 | 13,5 | 3 | 12,0 |  |
| 5. The communicative process in education for women's health | 8 | 10,4 | 4 | 7,7 | 4 | 16,0 |  |
| 6. Teaching strategies | 11 | 14,3 | 6 | 11,5 | 5 | 20,0 |  |
| 7. Application of group dynamics in educational programs for women's health | 1 | 1,3 | 1 | 1,9 | 2 | 8,0 |  |
| 8. Gender perspective in health education programs | 12 | 15,6 | 7 | 13,5 | 5 | 20,0 |  |
| 9. Development of a health education program for women | 2 | 2,6 | 0 | 0,0 | 2 | 8,0 |  |
| 10. Research in Women's Health | 1 | 1,3 | 1 | 1,9 | 0 | 0,0 |  |
|  |  |  |  |  |  |  |  |
| **XIV. Legislation and Ethics** |  |  |  |  |  |  |  |
| 1. Rights of women and the newborn | 3 | 3,9 | 3 | 5,8 | 0 | 0,0 |  |
| 2. Labor rights and maternity | 3 | 3,9 | 3 | 5,8 | 0 | 0,0 |  |
| 3. Ethical aspects in women's health care | 3 | 3,9 | 3 | 5,8 | 0 | 0,0 |  |
| 4. Legal responsibilities | 3 | 3,9 | 3 | 5,8 | 0 | 0,0 |  |
| 5. Control and protection of professional practice | 3 | 3,9 | 3 | 5,8 | 0 | 0,0 |  |
| 6 Legislation and ethics at birth | 4 | 5,2 | 10 | 19,2 | 4 | 16,0 |  |
| 7. Legislation and ethics in assisted reproduction | 2 | 2,6 | 14 | 26,9 | 6 | 24,0 |  |
| 8. Legislation and ethics in contraception and interruption of pregnancy | 4 | 5,2 | 10 | 19,2 | 4 | 16,0 |  |
| 9. Crimes against sexual freedom | 5 | 6,5 | 4 | 7,7 | 1 | 4,0 |  |
| 10. Adoption and foster care of a child | 3 | 3,9 | 3 | 5,8 | 0 | 0,0 |  |
| 11. Surrogacy | 1 | 1,3 | 1 | 1,9 | 0 | 0,0 |  |
|  |  |  |  |  |  |  |  |
| **XV. Women's Health Services Administration** |  |  |  |  |  |  |  |
| 1. Health systems models | 2 | 2,6 | 2 | 3,8 | 0 | 0,0 |  |
| 2. Analysis of the situation | 2 | 2,6 | 2 | 3,8 | 0 | 0,0 |  |
| 3. The Maternal-Infant Hospital | 2 | 2,6 | 2 | 3,8 | 0 | 0,0 |  |
| 4. Primary-Community Care | 3 | 3,9 | 2 | 3,8 | 1 | 4,0 |  |
| 5. Development of objectives in Women's Health | 2 | 2,6 | 2 | 3,8 | 0 | 0,0 |  |
| 6. Registration systems in Women's Health | 2 | 2,6 | 2 | 3,8 | 0 | 0,0 |  |
| 7. Coordination between the different levels of healthcare | 2 | 2,6 | 2 | 3,8 | 0 | 0,0 |  |
| 8. Development of healthcare protocols | 2 | 2,6 | 2 | 3,8 | 0 | 0,0 |  |
| 9. Process and program evaluation | 3 | 3,9 | 2 | 3,8 | 1 | 4,0 |  |

**Bold:** Percentage ≥ 75%
